# Supplementary material
Source: Research Square preprint supplement (doi:10.21203/rs.3.rs-9137847/v1)
Supplement: Supplementary file 1 [file dfc4c1a610901f4653df6bed.xlsx]

## Sheet: Sheet1
CECA	Number of multi-level ICH items	Number of ICH inheritors	ICH resource density	Number of traditional villages	Regional GDP	GDP per capita	Income growth rate	Tourism revenue	Tourism revenue growth rate	Tourist visits
The CECA of southern Fujian	635	1264	0.0248067	45	7463.89	116293	0.0913333	3505.72	0.224333	22267.1
The ethnic CECA of Southeast Guizhou	713	4525	0.0235449	574	1123.04	31678	0.286297	1210.58	0.293	12893
The CECA of Regong	267	94	0.0146703	30	100.95	36024	0.106	23.52	0.205	810.7
The CECA of Gesar(Guoluo)	230	3261	0.00295649	4	46.1835	21990	0.114	2.814	0.1989	39.22
The CECA of Qiang Ethnic	520	1859	0.0118258	32	490.1	38101.9	0.0808678	316.617	0.344283	4146.32
The CECA of Tujia ethnic and Miao ethnic in Wuling Mountains (Xiangxi)	386	350	0.0249032	172	705.71	26691	0.094	526	0.203	5746.93
The CECA of Tonggu(Hechi)	176	118	0.00525373	4	878.1	24703	0.095	548.22	0.346812	4493.01
The CECA of Hakka(Meizhou)	125	117	0.00787352	78	1187.06	27906	0.08	550.02	0.091	4990.12
The ethnic CECA of Diqing	133	310	0.00573625	21	251.2	61697	0.0926347	26.576	-0.034	2110
The CECA of Northern Shaanxi	288	1264	0.00660884	34	4136.28	120908	0.092	276.57	0.089	4935.23
The CECA of Qilu(Weifang)	244	283	0.0151149	3	5688.5	60760	0.138648	911.68	0.123	8240.1
The CECA of Marine fishing culture (Xiangshan)	73	196	0.052822	2	54.8589	103517	0.082	326	0.1941	2915.02
The CECA of Jinzhong	406	1388	0.0247561	77	1460	43125	0.085	1178	0.173	11590.6
The CECA of Huizhou	342	3068	0.0152006	130	1037.48	49235	0.114034	364.705	0.159786	10347.9
The CECA of Hakka(Southern Jiangxi)	448	1560	0.0113764	51	3474.34	39968	-0.132369	1397.7	0.259	13400
The CECA of Dali	144	2344	0.00488815	130	1364.9	38097	0.0936683	899.24	0.1949	5300
